# Supplementary material for: The concentration and origins of carboxylic acid groups in oil paint
Source: Royal Society of Chemistry journal article supplement (doi:10.1039/c9ra06776k), 2019-01-01
Supplement: c9ra06776k1.pdf [file c9ra06776k1.pdf]

# The concentration and origins of carboxylic acid groups in oil paint

Lambert Baij,<sup>\*a,b</sup> Louise Chassouant,<sup>a</sup> Joen J. Hermans,<sup>a,b</sup> Katrien Keune,<sup>a,b</sup>  
and Piet Iedema<sup>a</sup>

\* E-mail: [C.L.M.Baij@uva.nl](mailto:C.L.M.Baij@uva.nl)

<sup>a</sup> Van 't Hoff Institute for Molecular Sciences, University of Amsterdam, PO box 94720, 1090GD  
Amsterdam, the Netherlands. Tel: +31 (0)20 525 7143

<sup>b</sup> Rijksmuseum Amsterdam, Conservation and Science, PO box 74888, 1070DN Amsterdam, the  
Netherlands.

## List of Figures

|    |                                                                                           |    |
|----|-------------------------------------------------------------------------------------------|----|
| S1 | IR spectrum polymerised LO . . . . .                                                      | 3  |
| S2 | Ester band subtraction procedure . . . . .                                                | 4  |
| S3 | TiO <sub>2</sub> background estimation and subtraction procedure . . . . .                | 5  |
| S4 | SEM images of pigment particles . . . . .                                                 | 12 |
| S5 | BaSO <sub>4</sub> normalized XRD spectra for mixed ZnO/BaSO <sub>4</sub> paints . . . . . | 13 |
| S6 | TiO <sub>2</sub> normalized XRD spectra for mixed ZnO/TiO <sub>2</sub> paints . . . . .   | 14 |
| S7 | FTIR spectrum of LO and reduced LO . . . . .                                              | 16 |
| S8 | FTIR spectrum of polymerised LO and polymerised reduced LO . . . . .                      | 17 |
| S9 | FTIR spectrum of tristearin and tristearin-ZnO . . . . .                                  | 18 |

## List of Tables

|   |                                                                  |    |
|---|------------------------------------------------------------------|----|
| 1 | Composition of LO-ZnO-BaSO <sub>4</sub> series 0.5–20% . . . . . | 6  |
| 2 | Composition of LO-ZnO-TiO <sub>2</sub> series 0.5–20% . . . . .  | 7  |
| 3 | Composition of rLO-ZnO-TiO <sub>2</sub> series 0.5–20% . . . . . | 8  |
| 4 | Composition of LO-ZnO-SA series 0–60% . . . . .                  | 9  |
| 5 | Composition of ZnO-TiO <sub>2</sub> -LO series 30–90% . . . . .  | 10 |
| 6 | Composition of rLO-ZnO-TiO <sub>2</sub> series 30–90% . . . . .  | 11 |

## FTIR spectrum polymerised LO

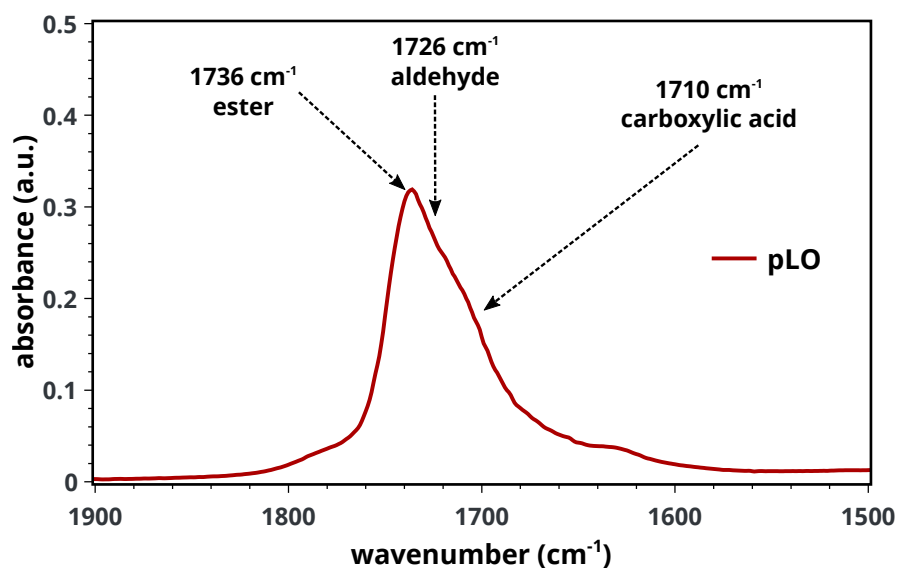

**Figure S1** Overlapping IR absorption bands of the asymmetric stretching vibration ( $\nu_a$  COO) of the ester (COOR, 1738 cm<sup>-1</sup>), aldehyde (COH, 1726 cm<sup>-1</sup>) and carboxylic acid (COOH, 1710 cm<sup>-1</sup>) carbonyl function in polymerised LO.

## COOZn IR band integration method

To integrate overlapping absorption bands accurately, data correction and integration algorithms were written in the Wolfram *Mathematica* software, which are available from the authors on request. Since the zinc carboxylate (COOZn) band present in ZnO-LO samples at  $1685\text{ cm}^{-1}$  overlaps with the ester carbonyl band (maximum at  $1738\text{ cm}^{-1}$ ), a band fitting algorithm was applied to subtract the ester band and integrate the COO-Zn band accurately (see Figure S2a). After subtraction of the Pearson type IV band shape<sup>1</sup> fitted to the ester carbonyl band, the area of the COOZn band was calculated (Figure S2b, integration limits are indicated with a dashed line).

### Ester band subtraction procedure

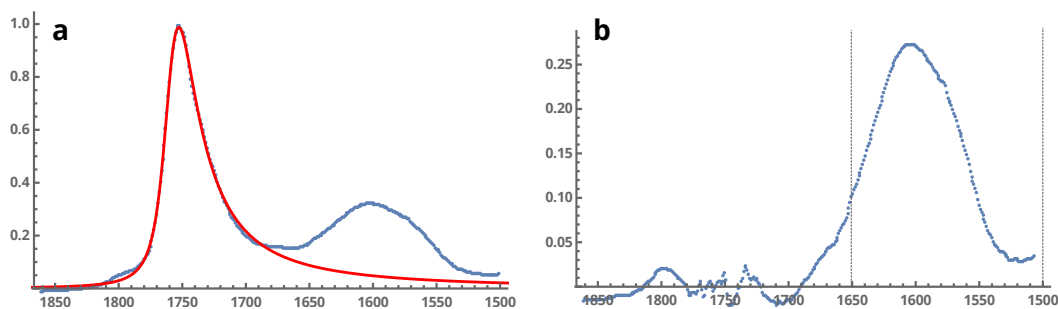

**Figure S2** Subtraction procedure for the asymmetric stretching vibration ( $\nu_a\text{ CO}$ ) of the ester (COOR,  $1738\text{ cm}^{-1}$ ) in polymerised LO. A Pearson type IV band shape<sup>1</sup> was fitted to the experimental data (a) and subtracted (b) before integration.

## TiO<sub>2</sub> background estimation and subtraction procedure

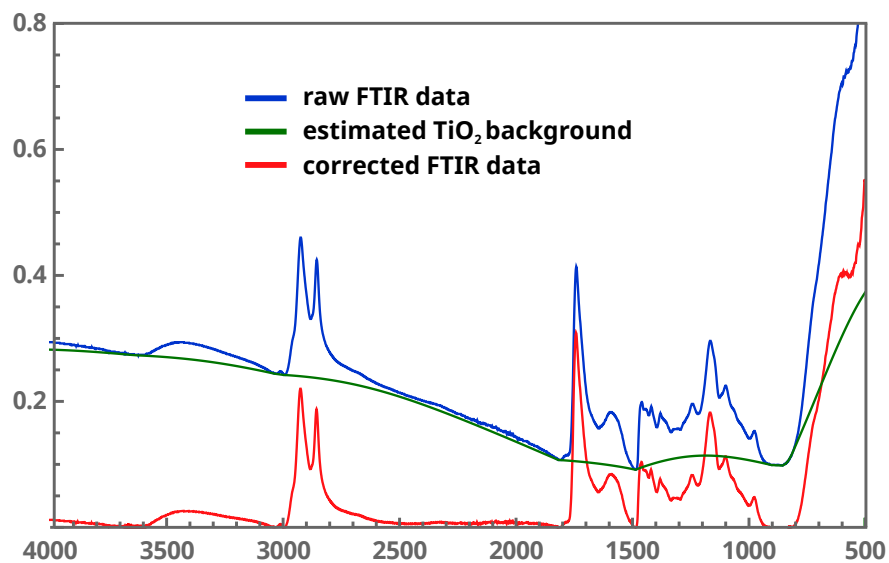

**Figure S3** Automated background subtraction procedure using *Mathematica* software. The changing concentration of TiO<sub>2</sub> along the LO-ZnO-TiO<sub>2</sub> samples requires a different background subtraction for every sample. After TiO<sub>2</sub> background estimation, the COO-Zn band area was calculated according to Figure S2.

## Composition of LO-ZnO-BaSO<sub>4</sub> series 0.5–20%

| Sample                         | Mass LO (mg) | Mass ZnO (mg) | Mass BaSO <sub>4</sub> (mg) | [ZnO] mol/L |
|--------------------------------|--------------|---------------|-----------------------------|-------------|
| LO-ZnO-BaSO <sub>4</sub> -0.5  | 1000.2       | 4.80          | 995.0                       | 0.045       |
| LO-ZnO-BaSO <sub>4</sub> -1    | 1000.1       | 10.2          | 989.7                       | 0.097       |
| LO-ZnO-BaSO <sub>4</sub> -1.5  | 1000.6       | 15.2          | 985.2                       | 0.14        |
| LO-ZnO-BaSO <sub>4</sub> -2.5  | 1000.3       | 25.0          | 975.2                       | 0.24        |
| LO-ZnO-BaSO <sub>4</sub> -3    | 1000.3       | 30.1          | 970.0                       | 0.28        |
| LO-ZnO-BaSO <sub>4</sub> -3.5  | 999.70       | 34.9          | 965.1                       | 0.33        |
| LO-ZnO-BaSO <sub>4</sub> -4    | 1000.4       | 40.2          | 960.1                       | 0.38        |
| LO-ZnO-BaSO <sub>4</sub> -4.5  | 999.50       | 44.9          | 955.0                       | 0.43        |
| LO-ZnO-BaSO <sub>4</sub> -5    | 999.30       | 49.8          | 950.0                       | 0.47        |
| LO-ZnO-BaSO <sub>4</sub> -7.5  | 999.80       | 75.1          | 924.9                       | 0.71        |
| LO-ZnO-BaSO <sub>4</sub> -10   | 1000.5       | 100.3         | 900.4                       | 0.95        |
| LO-ZnO-BaSO <sub>4</sub> -12.5 | 999.70       | 124.8         | 874.8                       | 1.2         |
| LO-ZnO-BaSO <sub>4</sub> -15   | 1000.2       | 149.9         | 850.4                       | 1.4         |
| LO-ZnO-BaSO <sub>4</sub> -17.5 | 999.80       | 175.2         | 824.9                       | 1.7         |
| LO-ZnO-BaSO <sub>4</sub> -20   | 1000.2       | 200.0         | 799.7                       | 1.9         |

**Table 1** Composition of LO-ZnO-BaSO<sub>4</sub> series 0.5–20% with a constant (1:1) pigment to oil ratio by weight and a PVC of 17–18%.

## Composition of LO-ZnO-TiO<sub>2</sub> series 0.5–20%

| Name                          | Mass LO (g) | Mass ZnO (g) | Mass TiO <sub>2</sub> (g) | [ZnO] mol/L |
|-------------------------------|-------------|--------------|---------------------------|-------------|
| LO-ZnO-TiO <sub>2</sub> -0.5  | 999.8       | 5.2          | 994.7                     | 0.049       |
| LO-ZnO-TiO <sub>2</sub> -1    | 1000.3      | 9.9          | 990.1                     | 0.092       |
| LO-ZnO-TiO <sub>2</sub> -1.5  | 1000.3      | 15.1         | 985.0                     | 0.14        |
| LO-ZnO-TiO <sub>2</sub> -2.5  | 1033.2      | 25.0         | 975.1                     | 0.23        |
| LO-ZnO-TiO <sub>2</sub> -3.5  | 1033.2      | 35.3         | 965.0                     | 0.33        |
| LO-ZnO-TiO <sub>2</sub> -4.5  | 1033.2      | 44.2         | 955.0                     | 0.41        |
| LO-ZnO-TiO <sub>2</sub> -5    | 999.6       | 49.8         | 950.3                     | 0.47        |
| LO-ZnO-TiO <sub>2</sub> -7.5  | 999.4       | 75.0         | 925.2                     | 0.70        |
| LO-ZnO-TiO <sub>2</sub> -10   | 1000.3      | 100.3        | 900.0                     | 0.94        |
| LO-ZnO-TiO <sub>2</sub> -12.5 | 1000.2      | 124.8        | 874.9                     | 1.2         |
| LO-ZnO-TiO <sub>2</sub> -15   | 999.9       | 149.9        | 850.0                     | 1.4         |
| LO-ZnO-TiO <sub>2</sub> -17.5 | 1000.6      | 174.9        | 825.1                     | 1.6         |
| LO-ZnO-TiO <sub>2</sub> -20   | 1000.1      | 200.3        | 800.1                     | 1.9         |

**Table 2** Composition of LO-ZnO-TiO<sub>2</sub> series 0.5–20% with a with a constant (1:1) pigment to oil ratio by weight and a PVC of of 17–18%.

### Composition of rLO-ZnO-TiO<sub>2</sub> series 0.5–20%

| Name                           | Mass LO (mg) | Mass ZnO (mg) | Mass TiO <sub>2</sub> (mg) | [ZnO] mol/L |
|--------------------------------|--------------|---------------|----------------------------|-------------|
| rLO-ZnO-TiO <sub>2</sub> -0.5  | 199.5        | 1.3           | 198.4                      | 0.059       |
| rLO-ZnO-TiO <sub>2</sub> -1    | 200.4        | 2.1           | 197.8                      | 0.10        |
| rLO-ZnO-TiO <sub>2</sub> -1.5  | 666.4        | 10.0          | 646.3                      | 0.14        |
| rLO-ZnO-TiO <sub>2</sub> -2.5  | 500.2        | 12.4          | 483.8                      | 0.23        |
| rLO-ZnO-TiO <sub>2</sub> -3.5  | 500.1        | 17.5          | 481.7                      | 0.33        |
| rLO-ZnO-TiO <sub>2</sub> -4.5  | 333.4        | 14.8          | 321.7                      | 0.41        |
| rLO-ZnO-TiO <sub>2</sub> -5    | 332.8        | 16.6          | 321.5                      | 0.47        |
| rLO-ZnO-TiO <sub>2</sub> -7.5  | 333.3        | 24.8          | 319.6                      | 0.69        |
| rLO-ZnO-TiO <sub>2</sub> -10   | 251.4        | 25.4          | 239.8                      | 0.94        |
| rLO-ZnO-TiO <sub>2</sub> -12.5 | 250.2        | 31.3          | 238.4                      | 1.2         |
| rLO-ZnO-TiO <sub>2</sub> -15   | 200.7        | 30.1          | 191.0                      | 1.4         |
| rLO-ZnO-TiO <sub>2</sub> -17.5 | 200.1        | 35.0          | 190.2                      | 1.6         |
| rLO-ZnO-TiO <sub>2</sub> -20   | 200.7        | 40.1          | 189.4                      | 1.8         |

**Table 3** Composition of LO-ZnO-TiO<sub>2</sub> series 0.5–20% with a PVC of of 17–19%



## Composition of LO-ZnO-SoA series 0–60%

| Name         | Mass LO (mg) | Mass ZnO (mg) | Mass SoA (mg) | [SoA] mol/L |
|--------------|--------------|---------------|---------------|-------------|
| LO-ZnO-SA-0  | 1033.2       | 1006.1        | 0             | 0           |
| LO-ZnO-SA-10 | 1004.1       | 998.3         | 38.3          | 0.26        |
| LO-ZnO-SA-20 | 1000.7       | 999.4         | 77.1          | 0.52        |
| LO-ZnO-SA-30 | 999.4        | 1000.0        | 115.2         | 0.76        |
| LO-ZnO-SA-40 | 1000.5       | 1000.2        | 153.8         | 0.99        |
| LO-ZnO-SA-50 | 1000.6       | 1000.7        | 192.1         | 1.2         |
| LO-ZnO-SA-60 | 999.7        | 1000.5        | 230.9         | 1.4         |

**Table 4** Composition of sorbic acid (LO-ZnO-SA) series 0–60% with a constant (1:1) pigment to oil ratio by weight.

## Composition of ZnO-TiO<sub>2</sub>-LO series 30–90%

| Name                        | Mass LO (mg) | Mass ZnO (mg) | Mass TiO <sub>2</sub> (mg) | [ZnO] mol/L |
|-----------------------------|--------------|---------------|----------------------------|-------------|
| LO-ZnO-TiO <sub>2</sub> -30 | 1000.4       | 302.1         | 753.7                      | 2.83        |
| LO-ZnO-TiO <sub>2</sub> -40 | 1000.2       | 401.3         | 682.0                      | 3.76        |
| LO-ZnO-TiO <sub>2</sub> -50 | 1002.2       | 501.1         | 605.0                      | 4.69        |
| LO-ZnO-TiO <sub>2</sub> -60 | 998.90       | 601.1         | 530.9                      | 5.64        |
| LO-ZnO-TiO <sub>2</sub> -70 | 1000.6       | 703.1         | 457.9                      | 6.59        |
| LO-ZnO-TiO <sub>2</sub> -80 | 1005.1       | 800.1         | 381.0                      | 7.47        |
| LO-ZnO-TiO <sub>2</sub> -90 | 1001.1       | 902.2         | 308.0                      | 8.45        |

**Table 5** Composition of ZnO-TiO<sub>2</sub>-LO series 30–90% with a constant PVC of 18%.

## Composition of rLO-ZnO-TiO<sub>2</sub> series 30–90%

| Name                         | Mass LO (mg) | Mass ZnO (mg) | Mass TiO <sub>2</sub> (mg) | [ZnO] mol/L |
|------------------------------|--------------|---------------|----------------------------|-------------|
| rLO-ZnO-TiO <sub>2</sub> -30 | 201.3        | 59.9          | 139.9                      | 0.140829    |
| rLO-ZnO-TiO <sub>2</sub> -40 | 201.2        | 78.7          | 120.2                      | 0.231425    |
| rLO-ZnO-TiO <sub>2</sub> -50 | 201.4        | 100.3         | 101.5                      | 0.330388    |
| rLO-ZnO-TiO <sub>2</sub> -60 | 201.0        | 120.1         | 81.0                       | 0.413875    |
| rLO-ZnO-TiO <sub>2</sub> -70 | 201.5        | 139.7         | 59.5                       | 0.466398    |
| rLO-ZnO-TiO <sub>2</sub> -80 | 199.7        | 159.0         | 40.3                       | 0.703532    |
| rLO-ZnO-TiO <sub>2</sub> -90 | 201.5        | 180.5         | 21.1                       | 0.941005    |

**Table 6** Composition of rLO-ZnO-TiO<sub>2</sub> series 30–90%. Pigment volume concentration 14–18%.

## SEM images of pigment particles

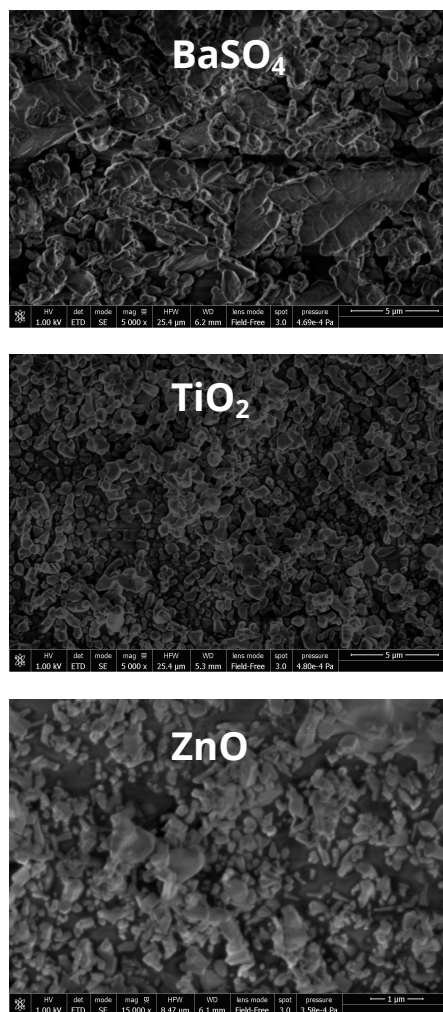

**Figure S4** SEM images of BaSO<sub>4</sub>, TiO<sub>2</sub> and ZnO pigments. BaSO<sub>4</sub> shows a more heterogeneous size distribution compared to TiO<sub>2</sub> but in the same 1 – 5 μm range, ZnO is smaller (≈ 0.5 μm).

## BaSO<sub>4</sub> normalised XRD spectra for ZnO/BaSO<sub>4</sub> paints

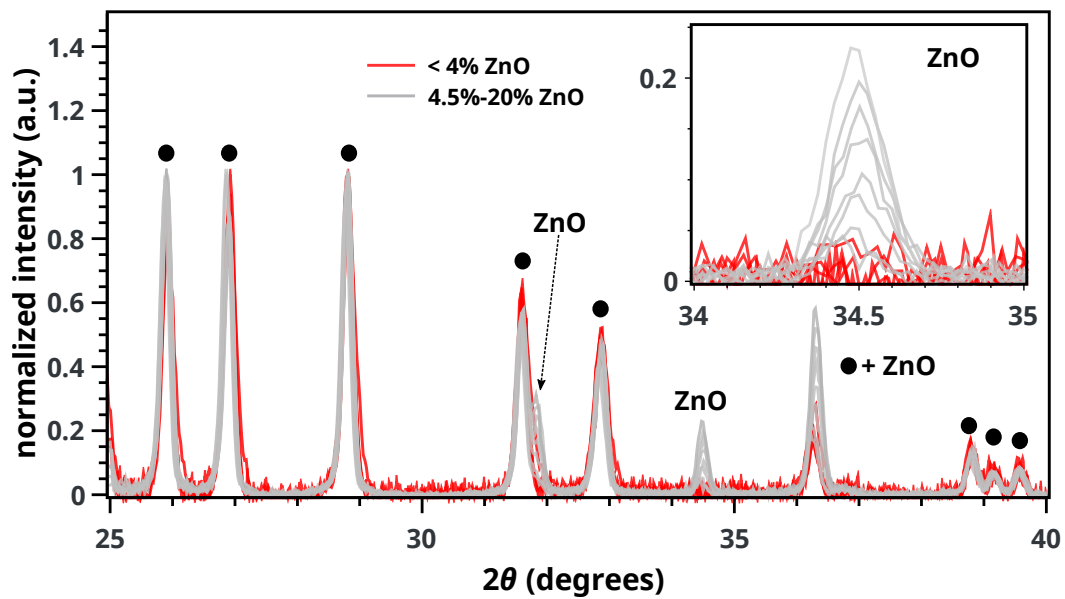

**Figure S5** BaSO<sub>4</sub> normalised XRD spectra for mixed ZnO/BaSO<sub>4</sub> paints containing 0.5–20 wt % of ZnO. Inset shows that ZnO is completely consumed below  $\approx$  4.5 wt%. BaSO<sub>4</sub> peaks are marked with ●.

## TiO<sub>2</sub> normalised XRD spectra for ZnO/TiO<sub>2</sub> paints

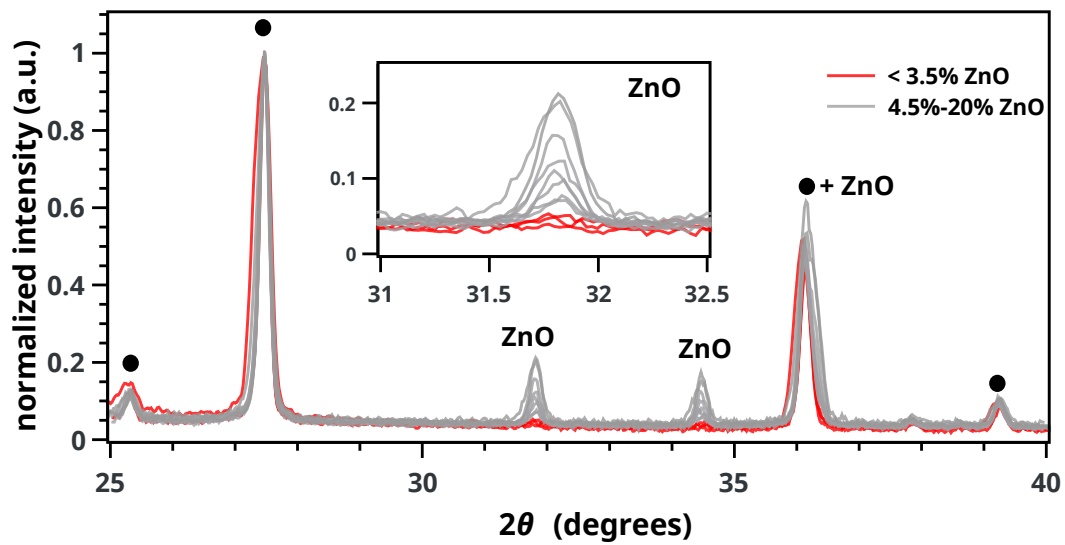

**Figure S6** TiO<sub>2</sub> normalised XRD spectra for mixed ZnO/TiO<sub>2</sub> paints containing 0.5–20 wt % of ZnO. Inset shows that ZnO is completely consumed below  $\approx 4.5$  wt%. TiO<sub>2</sub> peaks are marked with •.

## Reduction of linseed oil with $\text{LiAlH}_4$

The reduction of linseed oil with lithium aluminium hydride  $\text{LiAlH}_4$  was done according to slightly modified literature procedures.<sup>2,3</sup>  $\text{LiAlH}_4$  (5.2 g, 138 mmol) was dispersed in 225 ml cold ( $0\text{ }^\circ\text{C}$ ) tetrahydrofuran (THF) under nitrogen atmosphere. Cold-pressed untreated linseed oil (LO, Kremer Pigmente, 15 g, 17 mmol) was added while stirring the reaction in a ice bath. The reaction mixture was then stirred continuously at allowed to reach room temperature. After 17 h, the mixture was cooled again to  $0\text{ }^\circ\text{C}$  and 40 ml of 2-propanol, ethanol and 20 ml of water was *slowly* added. The mixture was stirred for 15 min and filtered using a Büchner funnel. The solvent was removed under reduced pressure, dissolved in dichloromethane and filtered over  $\text{MgSO}_4$ . The solvent was removed under reduced pressure to give the mixture of alcohols (14 g, 93% yield).  $^1\text{H}$  NMR (300 MHz,  $\text{CDCl}_3$ )  $\delta$  5.50 – 5.21 (m,  $-\text{CH}=\text{CH}-$ ), 3.64 (t,  $J = 6.6$  Hz,  $-\text{CH}_2\text{OH}$ ), 2.81 (t,  $J = 5.8$  Hz,  $-\text{CH}=\text{CHCH}_2\text{CH}=\text{CH}-$ ), 2.17 – 1.96 (m,  $\text{CH}=\text{CHCH}_2\text{C}^-$ ), 1.56 (s,  $-\text{CH}_2\text{CH}_2\text{OH}$ ), 1.37 – 1.28 (br,  $-\text{CCH}_2\text{C}-$ ), 0.97 (t,  $J = 7.5$  Hz,  $\text{CH}_3$ ).

## FTIR spectrum of LO and reduced LO

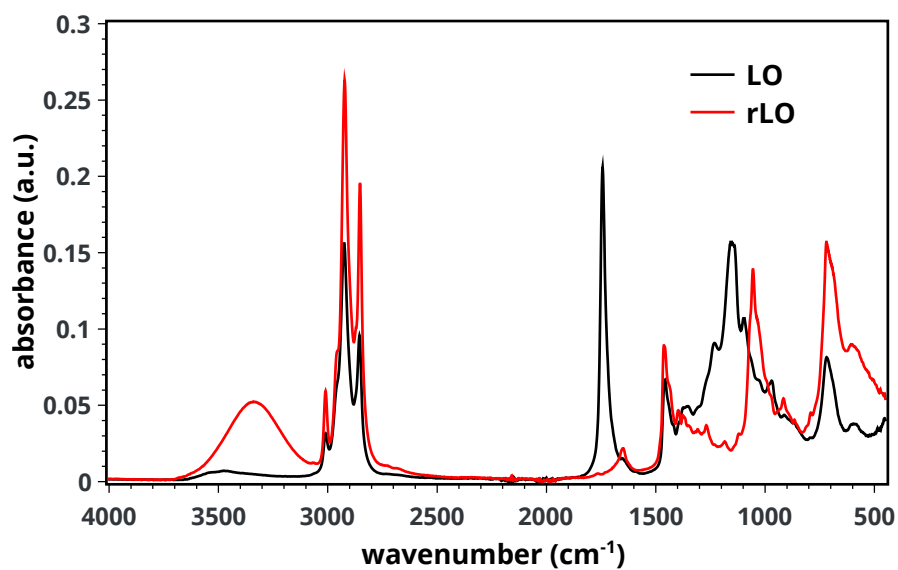

**Figure S7** FTIR spectrum of LO and reduced LO (rLO), clearly showing the reduction of all esters ( $1736\text{ cm}^{-1}$ ) for rLO and the presence of the OH stretch ( $3400\text{ cm}^{-1}$ , broad) in the mixture of alcohols.



## FTIR spectrum of polymerised LO and polymerised reduced LO

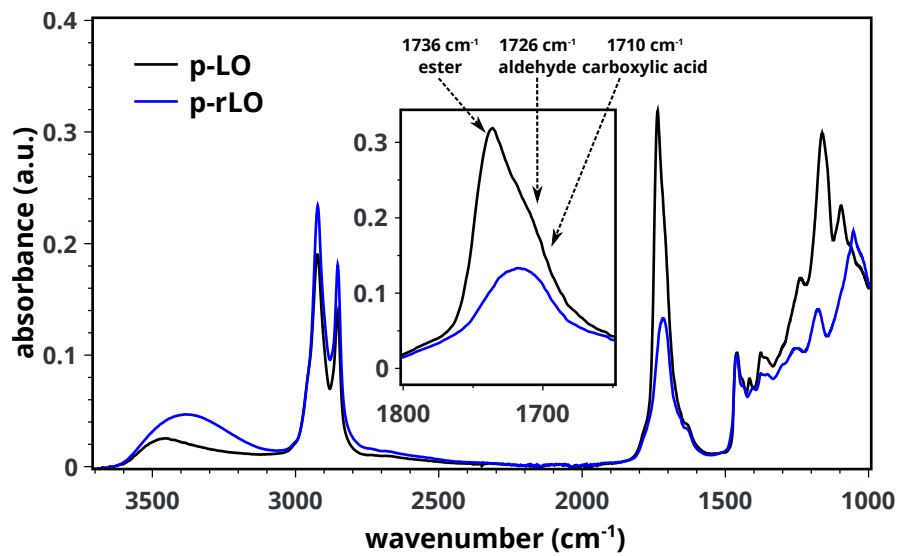

Figure S8 FTIR spectrum of polymerised LO (p-LO) and polymerised reduced LO (p-rLO).

## FTIR spectrum of tristearin and tristearin-ZnO

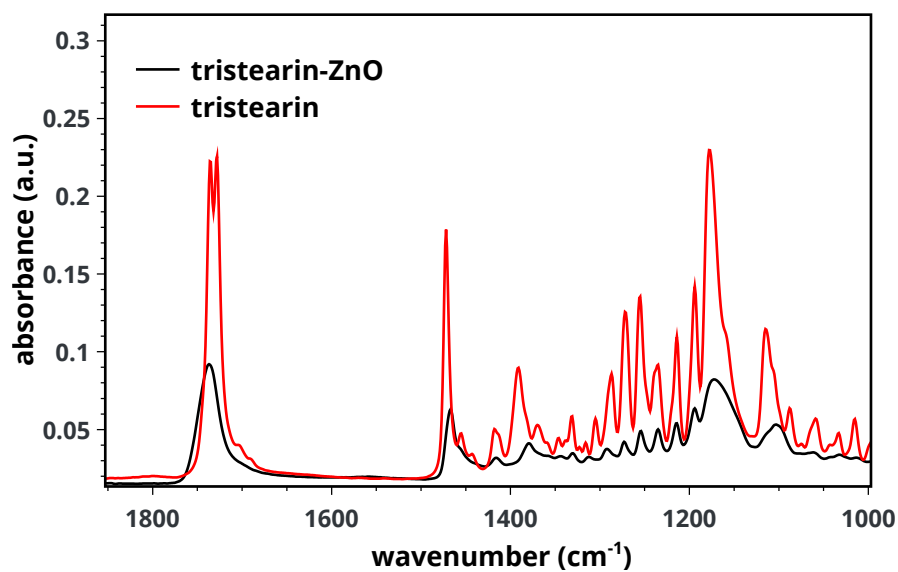

**Figure S9** FTIR spectrum of tristearin and tristearin-ZnO, clearly showing that 1 week at 60°C and 12% RH did not lead to the formation of significant amounts of COOZn. A split ester carbonyl band is observed for tristearin due to the presence of different polymorphs.<sup>4,5</sup>

## References

- [1] H. Keles, A. Naylor, F. Clegg and C. Sammon, *The Analyst*, 2014, **139**, 2355–2369.
- [2] H. M. Walborsky and C. Colombini, *The Journal of Organic Chemistry*, 1962, **27**, 2387–2390.
- [3] T. Tsujimoto, H. Uyama and S. Kobayashi, *Macromolecules*, 2004, **37**, 1777–1782.
- [4] J. Yano and K. Sato, *Food Research International*, 1999, **32**, 249–259.
- [5] E. Da Silva, S. Bresson and D. Rousseau, *Chemistry and Physics of Lipids*, 2009, **157**, 113–119.
